# Supplementary material for: The development of a light-up red-emitting fluorescent probe based on a G-quadruplex specific cyanine dye
Source: Royal Society of Chemistry journal article supplement (doi:10.1039/c6ra11152a), 2016-01-01
Supplement: c6ra11152a1.pdf [file c6ra11152a1.pdf]

## The development of a light-up red-emitting fluorescent probe based on a G-quadruplex specific cyanine dye

Xing Chen, Jine Wang, Guimei Jiang, Guangyue Zu, Min Liu, Lu Zhou, Renjun Pei\*

Table S1 The oligonucleotides used in this study.

| Name         | Sequence(5' to 3')               |
|--------------|----------------------------------|
| <i>c-myc</i> | TGGGGAGGGTGGGGAGGGTGGGGAAGG      |
| <i>bcl-2</i> | GGGCGGGCGCGGGAGGAAGGGGGCGGG      |
| <i>kit1</i>  | AGGGAGGGCGCTGGGAGGAGGG           |
| <i>Kras</i>  | AGGGCGGTGTGGGAAGAGGGAAGAGGGGGAGG |
| <i>HT 22</i> | AGGGTTAGGGTTAGGGTTAGGG           |
| <i>Hras</i>  | TCGGGTTGCGGGCGCAGGGCACGGGCG      |
| <i>TBA</i>   | GGTTGGTGTGGTTGG                  |
| ssDNA1       | TAACATGTTCGTCGATTAGGTACGACT      |
| ssDNA2       | AGTCGTACCTAATCGACGAACATGTTA      |
| dsDNA        | ssDNA1+ ssDNA2                   |
| 27           |                                  |
| ct-DNA       | Calf thymus DNA                  |

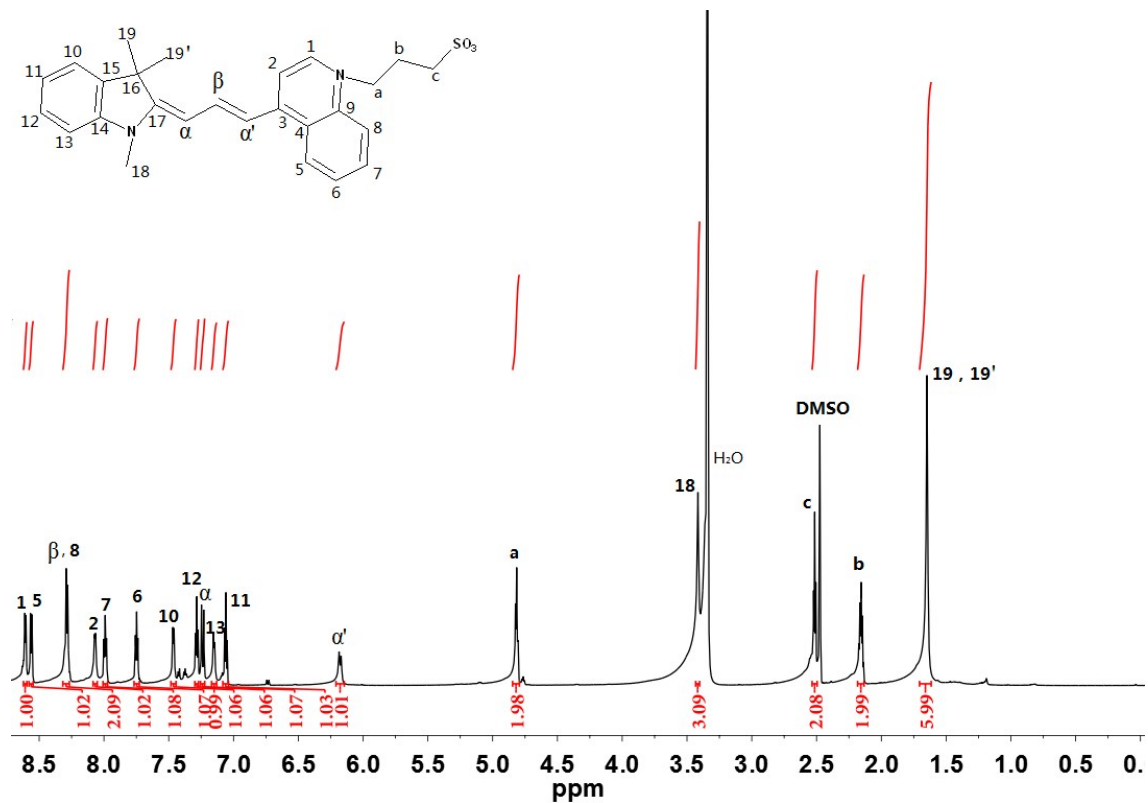

Fig. S1. The  $^1\text{H NMR}$  spectrum of Dir.

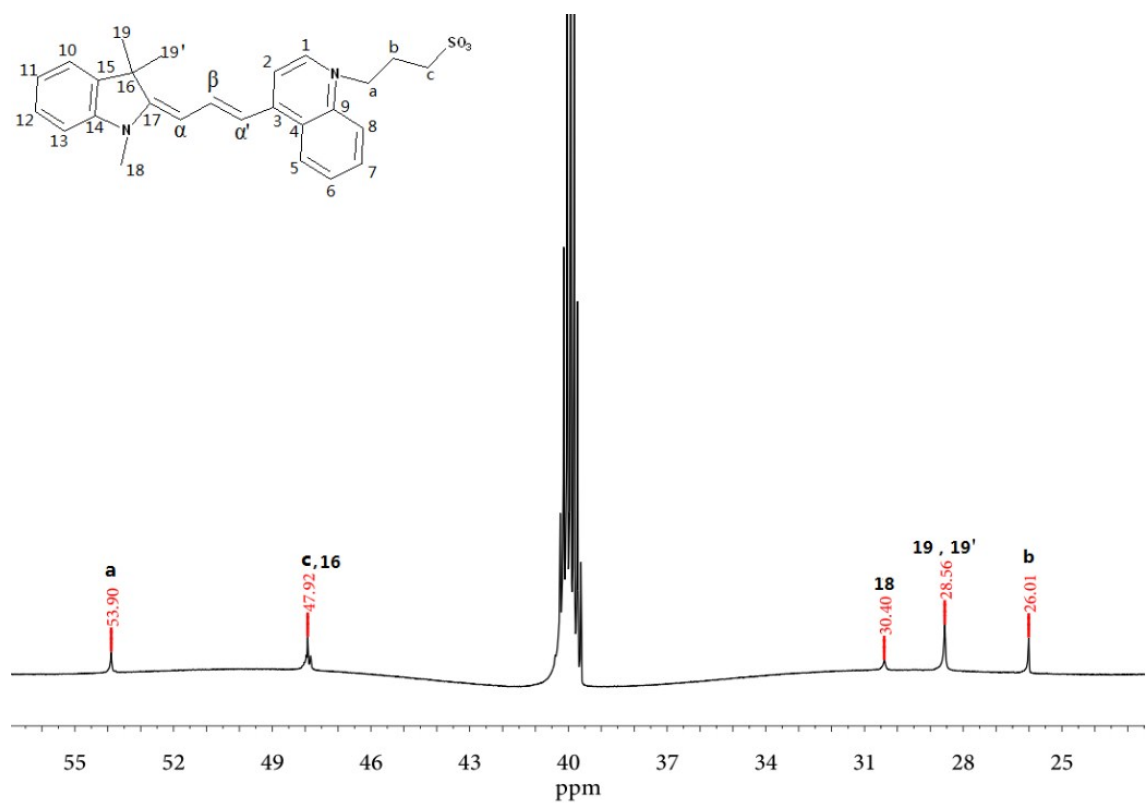

Fig. S2 The  $^{13}\text{C NMR}$  expansion 1 of Dir.

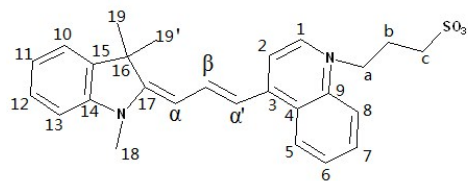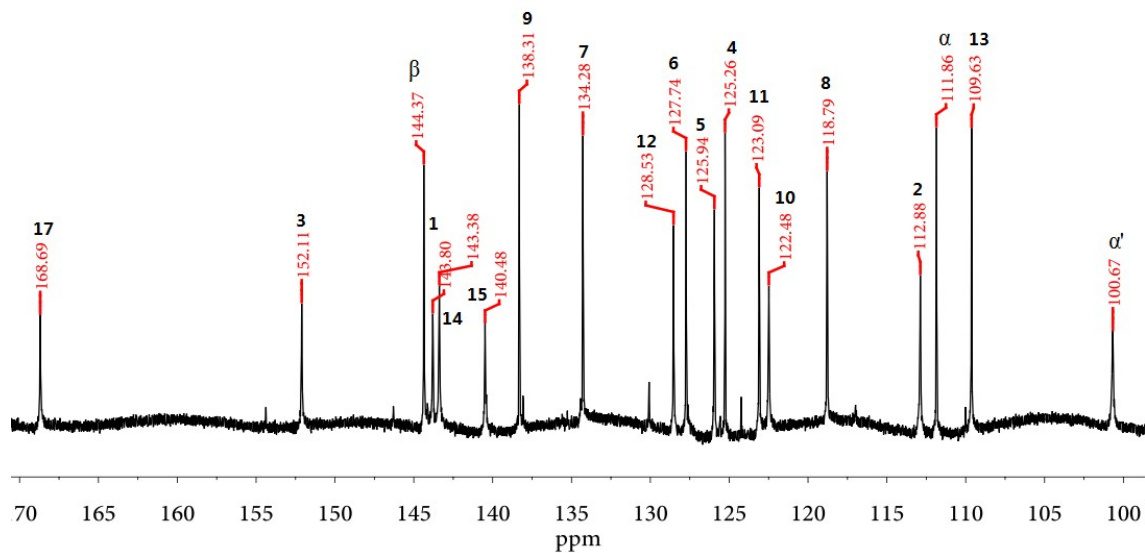

Fig. S3 The  $^{13}\text{C}$  NMR expansion 2 of Dir.

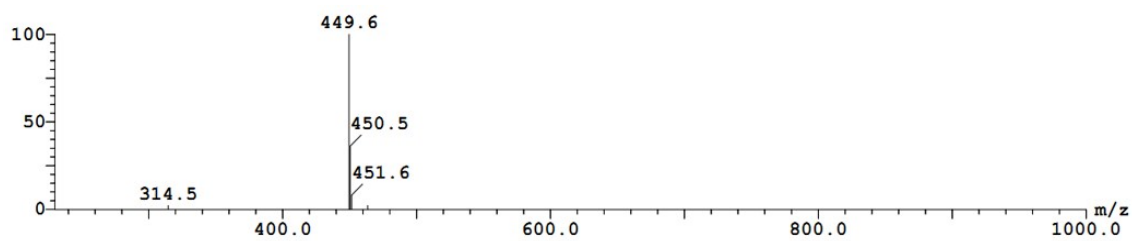

Fig. S4. The ESI-MS spectrum of Dir.

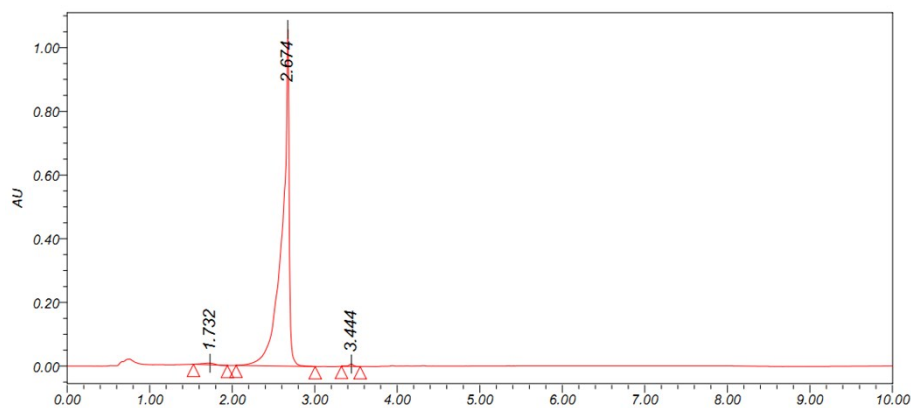

Fig. S5. The purity of Dir was determined by UPLC.

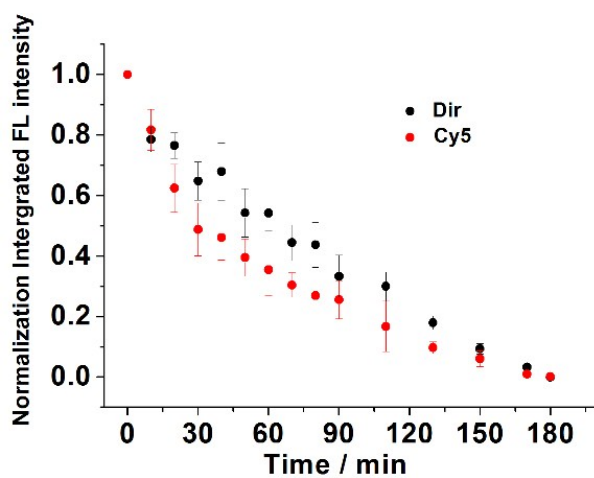

Fig. S6 Comparison on the photostability of Dir and Cy5. All samples were continuously irradiated using a 500 W xenon lamp.

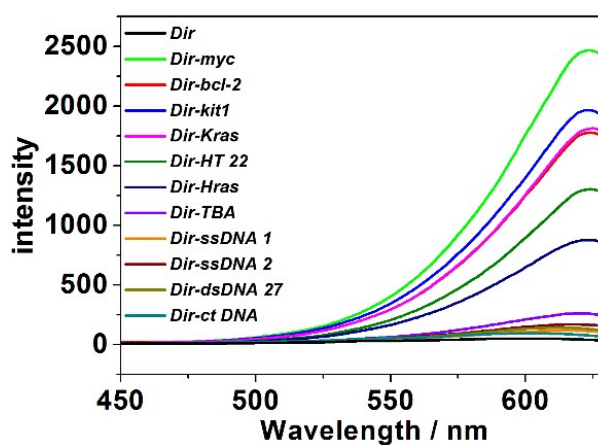

Fig. S7. The excitation spectra of Dir (0.5  $\mu$ M) alone and Dir with DNA (15 $\mu$ M).

The emission wavelength was set at 651 nm.

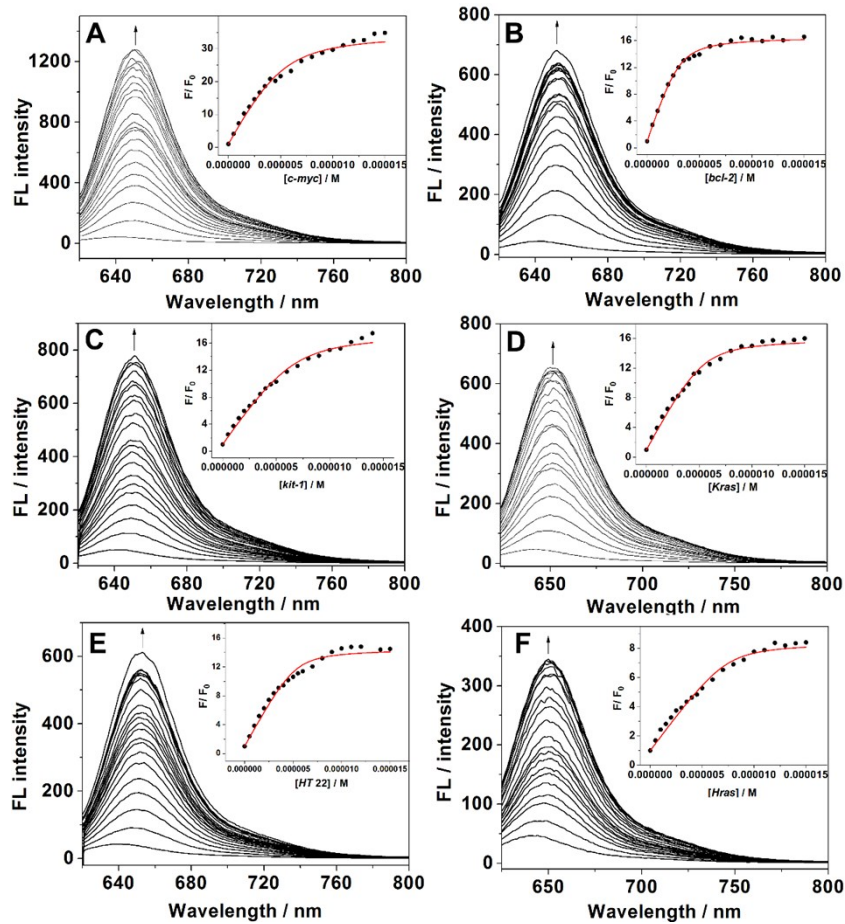

Fig. S8. Fluorescence titration assay of Dir (0.5  $\mu\text{M}$ ) with *c-myc* (A, 0.5–15  $\mu\text{M}$ ), *bcl-2* (B, 0.5–15  $\mu\text{M}$ ), *kit 1* (C, 0.5–15  $\mu\text{M}$ ), *Kras* (D, 0.5–15  $\mu\text{M}$ ), *HT 22* (E, 0.5–15  $\mu\text{M}$ ) and *Hras* (F, 0.5–15  $\mu\text{M}$ ) in 20 mM Tris-HCl buffer with 100 mM KCl. Each insert figures represented the determination of apparent binding equilibrium constant  $K_a$ .

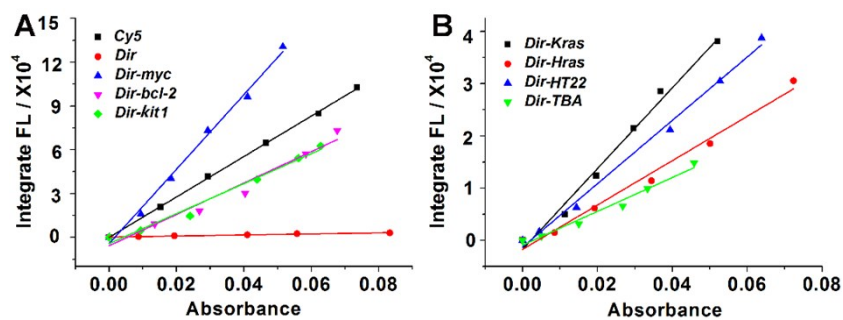

Fig. S9 Fluorescence quantum yield determination of Dir in the absence (A) and presence of G-quadruplex (A, B) in 20 mM Tris-HCl buffer with 100 mM KCl.

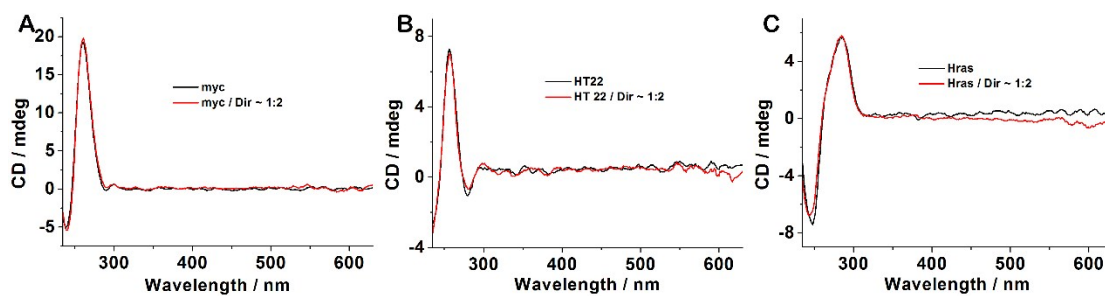

Fig. S10. CD spectra of 4  $\mu\text{M}$  G-quadruplex-forming oligonucleotides *c-myc* (A), *HT22* (B) and *Hras* (C) in the absence and presence of Dir (8  $\mu\text{M}$ ) in 20 mM Tris-HCl buffer, pH 7.4.
